# Supplementary material for: RAS and PP2A activities converge on epigenetic gene regulation
Source: Life Sci Alliance. 2023 Mar 1;6(5):e202301928. doi: 10.26508/lsa.202301928 (PMC9979842; doi:10.26508/lsa.202301928)
Supplement: Supplementary file 4 [file LSA-2023-01928_TableS4.xlsx]

## Sheet: Description
Table S4 Statistical analysis of overlapping PP2A regulated DAP vs. DAPs in clinical lung cancer samples
Fisher’s exact test was used to test if the PP2A regulated DAPs overlap the open chromatin areas in clinical lung cancer samples in statistically significant manner.
Overlap was found to be significantly enriched in chromosomes 6, 7 and 19 in the case of LUAD samples and in chromosomes 6, 18, 19 and 22 in the case of LUSC samples (p-value < 0.05).

## Sheet: Overlapping DAPs
Table SXXX Statistical analysis of overlapping PP2A regulated DAP vs. DAPs in clinical lung cancer samples
Chromosome	DAPs	overlapping DAPs in LUAD	overlapping DAPs in LUSC	p-value LUAD	p-value LUSC
chr1	72	21	15	0.889343	0.707455
chr2	34	7	3	0.980135	0.991905
chr3	21	5	4	0.910659	0.742193
chr4	16	9	4	0.06541	0.51347
chr5	35	7	6	0.984835	0.846825
chr6	49	26	17	0.00583873	0.0347859
chr7	34	18	8	0.0219097	0.527571
chr8	25	8	3	0.697653	0.948861
chr9	31	13	7	0.260855	0.58358
chr10	23	8	4	0.588784	0.807229
chr11	28	7	4	0.911633	0.913246
chr12	30	9	4	0.780309	0.938474
chr13	11	0	0	1	1
chr14	19	2	1	0.997122	0.9931
chr15	23	3	1	0.996088	0.997619
chr16	69	30	19	0.0812853	0.20143
chr17	96	31	15	0.759073	0.975391
chr18	14	8	7	0.0738621	0.0226715
chr19	101	53	52	9.56253e-05	1.27699e-11
chr20	23	5	1	0.947412	0.997619
chr21	25	6	0	0.920772	1
chr22	51	18	18	0.537929	0.0252168
chrX	19	4	1	0.943056	0.9931
chrY	2	0	0	1	1
