# Supplementary material for: RAS and PP2A activities converge on epigenetic gene regulation
Source: Life Sci Alliance. 2023 Mar 1;6(5):e202301928. doi: 10.26508/lsa.202301928 (PMC9979842; doi:10.26508/lsa.202301928)
Supplement: Supplementary file 5 [file LSA-2023-01928_TableS5.xlsx]

## Sheet: Description
Table S5 Nearest genes of overlapping DAPs in significantly enriched chromosomes
annotatePeak.pl from Homer v4.9 was used to find the nearest genes for PP2A upregulated and downregulated DAPs overlapping open chromatin areas in clinical lung cancer samples in statistically significant manner (chromosomes 6, 7 and 19). Analysis is based on hg38 genome annotations.

## Sheet: chr6 upreg LUAD
Chr	Start	End	Ensembl	Gene name
chr6	26304901	26305400	ENSG00000158406	HIST1H4H
chr6	26312299	26312798	ENSG00000158406	HIST1H4H
chr6	26312468	26312967	ENSG00000158406	HIST1H4H
chr6	26312784	26313283	ENSG00000158406	HIST1H4H
chr6	26322089	26322588	ENSG00000158406	HIST1H4H
chr6	26322184	26322683	ENSG00000158406	HIST1H4H
chr6	26322515	26323014	ENSG00000158406	HIST1H4H
chr6	26322664	26323163	ENSG00000158406	HIST1H4H
chr6	26322771	26323270	ENSG00000158406	HIST1H4H
chr6	26322885	26323384	ENSG00000158406	HIST1H4H
chr6	26323006	26323505	ENSG00000158406	HIST1H4H
chr6	26554351	26554850		LOC105374988
chr6	26555077	26555576		LOC105374988
chr6	31620617	31621116	ENSG00000204469	PRRC2A
chr6	31814583	31815082	ENSG00000204390	HSPA1L
chr6	31815627	31816126	ENSG00000204389	HSPA1A
chr6	31827743	31828242	ENSG00000204388	HSPA1B
chr6	32968444	32968943	ENSG00000204256	BRD2
chr6	36547018	36547517	ENSG00000112079	STK38
chr6	36547161	36547660	ENSG00000112079	STK38
chr6	63573036	63573535	ENSG00000112245	PTP4A1

## Sheet: chr6 upreg LUSC
Chr	Start	End	Ensembl	Gene name
chr6	26312299	26312798	ENSG00000158406	HIST1H4H
chr6	26312468	26312967	ENSG00000158406	HIST1H4H
chr6	26312784	26313283	ENSG00000158406	HIST1H4H
chr6	26322089	26322588	ENSG00000158406	HIST1H4H
chr6	26322184	26322683	ENSG00000158406	HIST1H4H
chr6	26322515	26323014	ENSG00000158406	HIST1H4H
chr6	26322664	26323163	ENSG00000158406	HIST1H4H
chr6	26322771	26323270	ENSG00000158406	HIST1H4H
chr6	26322885	26323384	ENSG00000158406	HIST1H4H
chr6	26323006	26323505	ENSG00000158406	HIST1H4H
chr6	26554351	26554850		LOC105374988
chr6	26555077	26555576		LOC105374988
chr6	31620617	31621116	ENSG00000204469	PRRC2A
chr6	31827743	31828242	ENSG00000204388	HSPA1B

## Sheet: chr6 downreg LUAD
Chr	Start	End	Ensembl	Gene name
chr6	5003632	5004131	ENSG00000272142	LYRM4-AS1
chr6	13328156	13328655	ENSG00000145979	TBC1D7
chr6	26020290	26020789	ENSG00000275714	HIST1H3A
chr6	117602209	117602708	ENSG00000047932	GOPC
chr6	132512773	132513272	ENSG00000079950	STX7

## Sheet: chr6 downreg LUSC
Chr	Start	End	Ensembl	Gene name
chr6	5003632	5004131	ENSG00000272142	LYRM4-AS1
chr6	13328156	13328655	ENSG00000145979	TBC1D7
chr6	26020290	26020789	ENSG00000275714	HIST1H3A

## Sheet: chr7 upreg LUAD
Chr	Start	End	Ensembl	Gene name
chr7	1961603	1962102	ENSG00000002822	MAD1L1
chr7	1961731	1962230	ENSG00000002822	MAD1L1
chr7	5420010	5420509	ENSG00000182095	TNRC18
chr7	5422026	5422525	ENSG00000182095	TNRC18
chr7	5423124	5423623	ENSG00000182095	TNRC18
chr7	5423266	5423765	ENSG00000182095	TNRC18
chr7	5427137	5427636	ENSG00000182095	TNRC18
chr7	5427398	5427897	ENSG00000182095	TNRC18
chr7	5427710	5428209	ENSG00000182095	TNRC18
chr7	5529625	5530124	ENSG00000075624	ACTB
chr7	5529805	5530304	ENSG00000075624	ACTB
chr7	5530065	5530564	ENSG00000075624	ACTB
chr7	75359232	75359731		STAG3L1

## Sheet: chr7 upreg LUSC
Chr	Start	End	Ensembl	Gene name
chr7	5422026	5422525	ENSG00000182095	TNRC18
chr7	5427137	5427636	ENSG00000182095	TNRC18
chr7	5427398	5427897	ENSG00000182095	TNRC18
chr7	5427710	5428209	ENSG00000182095	TNRC18
chr7	75359232	75359731		STAG3L1

## Sheet: chr7 downreg LUAD
Chr	Start	End	Ensembl	Gene name
chr7	2558924	2559423	ENSG00000106012	IQCE
chr7	17940444	17940943	ENSG00000071189	SNX13
chr7	23105576	23106075	ENSG00000122550	KLHL7
chr7	73770084	73770583	ENSG00000165215	CLDN3
chr7	130668400	130668899	ENSG00000158623	COPG2

## Sheet: chr7 downreg LUSC
Chr	Start	End	Ensembl	Gene name
chr7	2558924	2559423	ENSG00000106012	IQCE
chr7	130668400	130668899	ENSG00000158623	COPG2
chr7	139341333	139341832	ENSG00000269955	C7orf55-LUC7L2

## Sheet: chr19 upreg LUAD
Chr	Start	End	Ensembl	Gene name
chr19	680319	680818	ENSG00000070404	FSTL3
chr19	1103700	1104199	ENSG00000167468	GPX4
chr19	1104163	1104662	ENSG00000167468	GPX4
chr19	1104369	1104868	ENSG00000167468	GPX4
chr19	1248712	1249211	ENSG00000167470	MIDN
chr19	1248815	1249314	ENSG00000167470	MIDN
chr19	1248927	1249426	ENSG00000167470	MIDN
chr19	1249090	1249589	ENSG00000167470	MIDN
chr19	1249405	1249904	ENSG00000167470	MIDN
chr19	1249901	1250400	ENSG00000167470	MIDN
chr19	1251429	1251928	ENSG00000167470	MIDN
chr19	1251813	1252312	ENSG00000167470	MIDN
chr19	1354515	1355014	ENSG00000160953	MUM1
chr19	1354624	1355123	ENSG00000160953	MUM1
chr19	1383364	1383863	ENSG00000115286	NDUFS7
chr19	1383475	1383974	ENSG00000115286	NDUFS7
chr19	1383648	1384147	ENSG00000115286	NDUFS7
chr19	1592702	1593201	ENSG00000071655	MBD3
chr19	1940988	1941487	ENSG00000133275	CSNK1G2
chr19	2474592	2475091	ENSG00000099860	GADD45B
chr19	2476585	2477084	ENSG00000099860	GADD45B
chr19	3985155	3985654	ENSG00000167658	EEF2
chr19	4145594	4146093	ENSG00000060566	CREB3L3
chr19	4723691	4724190	ENSG00000142002	DPP9
chr19	4723861	4724360	ENSG00000142002	DPP9
chr19	4724373	4724872	ENSG00000142002	DPP9
chr19	5690052	5690551	ENSG00000130255	RPL36
chr19	6372872	6373371	ENSG00000125652	ALKBH7
chr19	6739174	6739673	ENSG00000125733	TRIP10
chr19	7903433	7903932	ENSG00000076984	MAP2K7
chr19	10654446	10654945	ENSG00000129351	ILF3
chr19	10871416	10871915	ENSG00000142453	CARM1
chr19	10871602	10872101	ENSG00000142453	CARM1
chr19	10871707	10872206	ENSG00000142453	CARM1
chr19	38849245	38849744	ENSG00000104824	HNRNPL
chr19	39412207	39412706	ENSG00000090924	PLEKHG2
chr19	42455667	42456166	ENSG00000189377	CXCL17
chr19	46289108	46289607	ENSG00000124440	HIF3A
chr19	47113636	47114135	ENSG00000130749	ZC3H4
chr19	47256674	47257173	ENSG00000105321	CCDC9
chr19	47256793	47257292	ENSG00000105321	CCDC9
chr19	47256928	47257427	ENSG00000105321	CCDC9
chr19	47923477	47923976		SNAR-A9
chr19	47933904	47934403		SNAR-A2
chr19	49929719	49930218	ENSG00000169136	ATF5
chr19	50100863	50101362		SNAR-A10

[truncated: 3 more sheets: chr19 upreg LUSC, chr19 downreg LUAD, chr19 downreg LUSC]
